# Supplementary material for: Nanoporous ZnO nanostructure synthesis by a facile method for superior sensitivity ethanol sensor applications
Source: Royal Society of Chemistry journal article supplement (doi:10.1039/c6ra11531d), 2016-01-01

# Electronic Supplementary

## **Nanoporous ZnO nanostructure synthesis by a facile method for superior sensitive ethanol sensor applications**

**Nguyen Thi Phuong Nhung<sup>2\*</sup>, Pham Van Tong<sup>1,3</sup>, Chu Manh Hung<sup>1</sup>, Nguyen Van Duy<sup>1</sup>, Nguyen Viet Chien<sup>1</sup>, Nguyen Van Vinh<sup>2</sup>, Nguyen Thai Tuyen<sup>2</sup>, Nguyen Duc Hoa<sup>1\*</sup>**

<sup>1</sup> International Training Institute for Materials Science (ITIMS), Hanoi University of Science and Technology, No. 1, Dai Co Viet, Hai Ba Trung, Hanoi, Viet Nam.

<sup>2</sup>PetroVietnam University, 7th floor, PVMTC Building, Cach Mang Thang Tam Str., Long Toan Ward, Ba Ria-Vung Tau Province, Vietnam.

<sup>3</sup>Department of Physics, Faculty of Mechanical Engineering, National University of Civil Engineering (NUCE), No. 55, Giai Phong Str., Hanoi, Viet Nam.

Corresponding authors: [ndhoa@itims.edu.vn](mailto:ndhoa@itims.edu.vn) (N D Hoa);

**Figure S 1.** A photo of precipitated product, and details about the calculation of the yield of material.

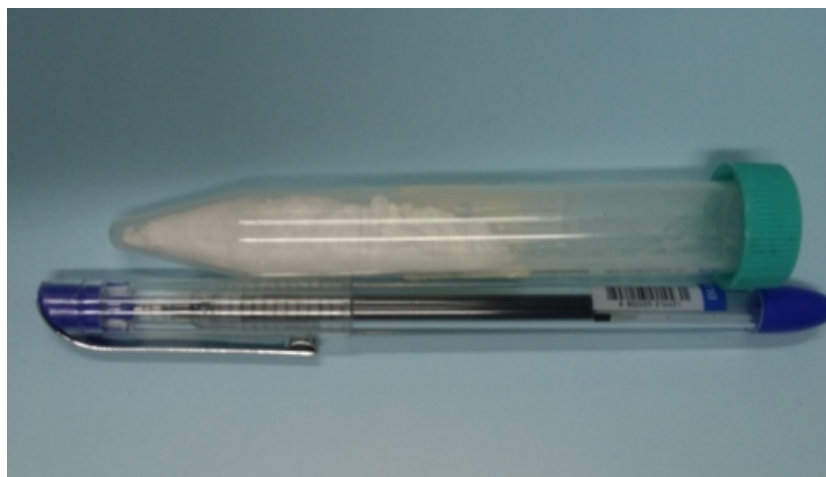

- Chemical reaction:  $5\text{Zn}(\text{NO}_3)_2 + 2\text{Na}_2\text{CO}_3 + 6\text{H}_2\text{O} = \text{C}_2\text{H}_6\text{O}_{12}\text{Zn}_5 + 4\text{NaNO}_3 + 6\text{HNO}_3$
- Mol of zinc nitrate,  $\text{Zn}(\text{NO}_3)_2$  used in this work (50 ml, 1M)  $\rightarrow n_{\text{Zn}^{2+}} = 50 \text{ mmol}$ .
- Mol of sodium carbonate,  $\text{Na}_2\text{CO}_3$  used in this work (10 mL of 1 M)  $\rightarrow n_{\text{Na}_2\text{CO}_3} = 10 \text{ mmol}$ .
- If assumed that 100% zinc nitrate was transferred into Hydrozincite  $\rightarrow$  mol of hydrozincite:  $n = 50/5 = 10 \text{ mmol} \rightarrow$  Weight of Hydrozincite (M=548.96 g/mol) theoretically calculated based on zinc nitrate used:  $m = 10 \times 548.96 \text{ (mg)} = 5489.6 \text{ mg} = 5.489 \text{ g}$
- However, the amount of  $\text{Na}_2\text{CO}_3$  used in this work is much less than the requirement amount for the reaction, thus the  $\text{Zn}(\text{NO}_3)_2$  remains in the reaction. Therefore, we calculated the yield of Hydrozincite over the sodium carbonate. With assumption that 100% of  $\text{Na}_2\text{CO}_3$  was reacted, thus weight of Hydrozincite theoretically calculated based on sodium carbonate used is:  $m = 5 \times 548.96 \text{ (mg)} = \mathbf{2.74 \text{ g}}$
- Weight of Hydrozincite obtained in our experiment:  $\sim 2.6 \text{ g}$
- Yield of over the is  $= 2.6/2.74 \approx 94\%$  of sodium carbonate used.

**Figure S2.** XRD patterns of the ZnO nanostructures calcinated at 400, 500, 600, and 700°C

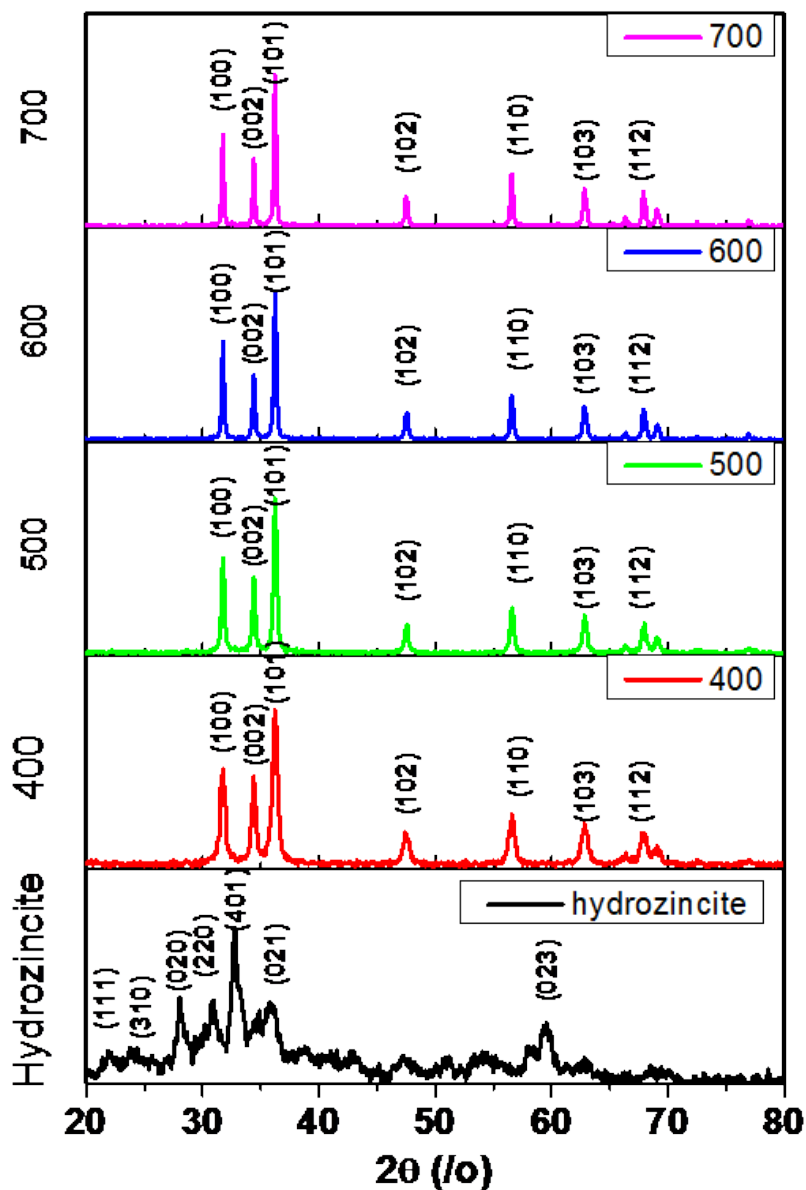

The average crystalline size calculated by Scherrer equation using the (101) peak is 16.1, 25.1, 31.0, and 35.9 nm, respectively.

**Figure S3.** SEM images of ZnO heat treated at different temperatures: (A) 400, (B) 500, (C) 600, and (D) 700°C

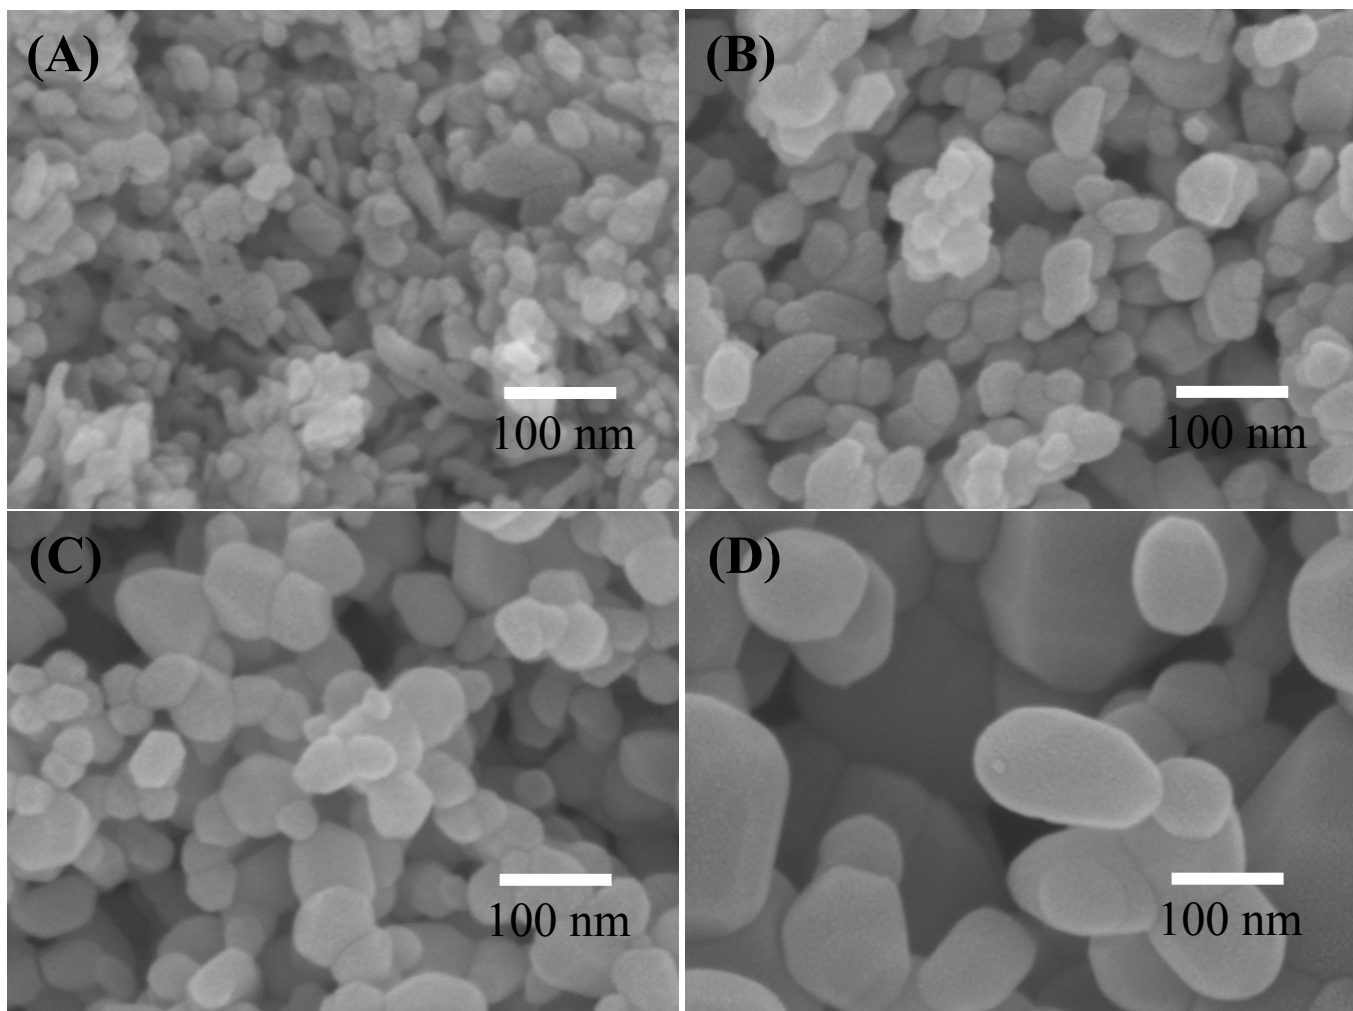

**Figure S4.** (A) Nitrogen adsorption/desorption isotherm of the ZnO nanostructures calcinated at 400°C; and (B) pore size distribution

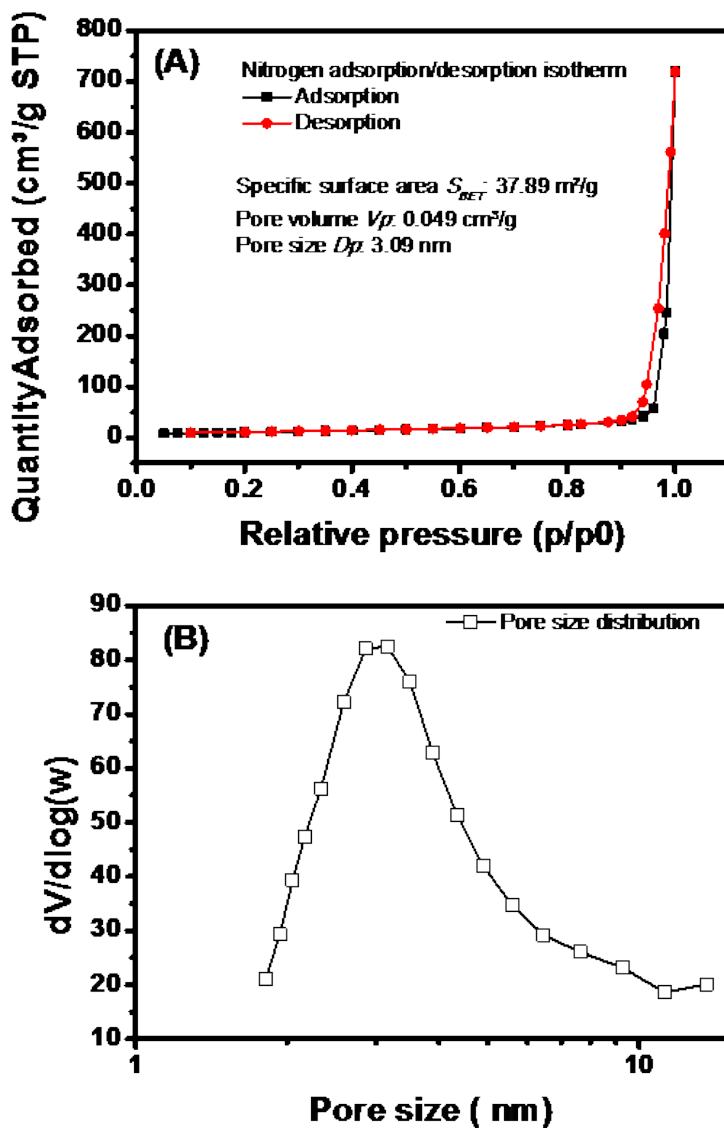

Supplement: c6ra11531d1.pdf [file c6ra11531d1.pdf]
